# Supplementary material for: Identification of Candidate Genes that Specifically Regulate Subcutaneous and Intramuscular Fat Deposition Using Transcriptomic and Proteomic Profiles in Dingyuan Pigs
Source: Research Square preprint supplement (doi:10.21203/rs.3.rs-754325/v1), 2021-07-30
Supplement: Supplementary file 1 [file 3746264ea863c4cfeabcc639.xlsx]

## Sheet: Table S7a
Table S7a. 62 DAPs between HBF and LBF.
Accession	Description	# Peptides	# Unique Peptides	MW [kDa]	calc. pI	HBF1	HBF2	HBF3	LBF1	LBF2	LBF3	Group_HBF.average	Group_LBF.average	Group_HBF.vs.Group_LBF.FC	pvalue
ENSSSCP00000019444.2	pep chromosome:Sscrofa11.1:9:127464119:127481735:1 gene:ENSSSCG00000029449.3 transcript:ENSSSCT00000031330.3 gene_biotype:protein_coding transcript_biotype:protein_coding description:proteoglycan 4 [Source:NCBI gene;Acc:100518683]	5	5	42.7	8.66	166.4	127.4	138.5	41.2	66.1	60.4	144.1	55.9	2.57782	0.00310275
ENSSSCP00000003343.3	pep chromosome:Sscrofa11.1:6:51372259:51377794:1 gene:ENSSSCG00000003088.4 transcript:ENSSSCT00000003426.4 gene_biotype:protein_coding transcript_biotype:protein_coding gene_symbol:APOE description:apolipoprotein E [Source:NCBI gene;Acc:397576]	16	16	33.6	6.84	135.7	119.6	105.4	73.6	76.9	88.7	120.233	79.7333	1.50794	0.0148632
ENSSSCP00000018489.3	pep chromosome:Sscrofa11.1:12:21115454:21119396:1 gene:ENSSSCG00000017448.4 transcript:ENSSSCT00000018994.4 gene_biotype:protein_coding transcript_biotype:protein_coding gene_symbol:KRT14 description:keratin, type I cytoskeletal 14-like [Source:NCBI gene;Acc:110255272]	8	6	42.4	5.11	119.1	96.4	143.9	78.5	86.2	76	119.8	80.2333	1.49314	0.0480729
ENSSSCP00000066242.1	pep chromosome:Sscrofa11.1:12:657495:662511:1 gene:ENSSSCG00000017127.4 transcript:ENSSSCT00000088014.1 gene_biotype:protein_coding transcript_biotype:protein_coding gene_symbol:CYBC1 description:chromosome 12 C17orf62 homolog [Source:NCBI gene;Acc:100522460]	2	2	26.9	6.9	120	100	135.6	94.5	69.1	80.7	118.533	81.4333	1.45559	0.0427044
ENSSSCP00000024395.2	pep chromosome:Sscrofa11.1:14:15011711:15023706:-1 gene:ENSSSCG00000023666.3 transcript:ENSSSCT00000026923.3 gene_biotype:protein_coding transcript_biotype:protein_coding gene_symbol:CTSB description:cathepsin B [Source:NCBI gene;Acc:100037961]	9	9	46.4	7.34	111	118.2	121	68.6	103.8	77.5	116.733	83.3	1.40136	0.038205
ENSSSCP00000044658.1	pep chromosome:Sscrofa11.1:5:3839501:3911709:-1 gene:ENSSSCG00000000010.4 transcript:ENSSSCT00000046398.2 gene_biotype:protein_coding transcript_biotype:protein_coding gene_symbol:FBLN1 description:fibulin 1 [Source:NCBI gene;Acc:100519144]	13	4	89.3	5.26	124.3	114.1	110.8	71.8	84.7	94.3	116.4	83.6	1.39234	0.0129481
ENSSSCP00000013693.4	pep chromosome:Sscrofa11.1:2:4233099:4293884:1 gene:ENSSSCG00000012880.5 transcript:ENSSSCT00000014079.4 gene_biotype:protein_coding transcript_biotype:protein_coding gene_symbol:CPT1A description:carnitine palmitoyltransferase 1A [Source:NCBI gene;Acc:399527]	2	2	88	8.5	127.1	117.3	103.3	69.8	94.6	87.9	115.9	84.1	1.37812	0.034844
ENSSSCP00000010045.4	pep chromosome:Sscrofa11.1:11:21164138:21222009:1 gene:ENSSSCG00000009412.4 transcript:ENSSSCT00000010313.4 gene_biotype:protein_coding transcript_biotype:protein_coding gene_symbol:LCP1 description:lymphocyte cytosolic protein 1 [Source:NCBI gene;Acc:100156254]	25	16	72.1	5.57	112	114.4	116.9	71.3	99.6	85.7	114.433	85.5333	1.33788	0.0252257
ENSSSCP00000002653.4	pep chromosome:Sscrofa11.1:7:114173693:114210017:-1 gene:ENSSSCG00000002452.4 transcript:ENSSSCT00000002722.4 gene_biotype:protein_coding transcript_biotype:protein_coding gene_symbol:LGMN description:legumain [Source:NCBI gene;Acc:100154477]	5	5	49.7	6.57	106.7	113.1	121.4	73.2	100.6	84.9	113.733	86.2333	1.3189	0.0379028
ENSSSCP00000035292.2	pep chromosome:Sscrofa11.1:3:18338117:18342379:1 gene:ENSSSCG00000038055.2 transcript:ENSSSCT00000048124.2 gene_biotype:protein_coding transcript_biotype:protein_coding gene_symbol:CORO1A description:coronin 1A [Source:NCBI gene;Acc:100621483]	7	6	54.1	7.11	111.8	110	116.7	74.4	97.6	89.6	112.833	87.2	1.29396	0.0224719
ENSSSCP00000015795.4	pep chromosome:Sscrofa11.1:9:11207835:11246711:1 gene:ENSSSCG00000014875.4 transcript:ENSSSCT00000016228.4 gene_biotype:protein_coding transcript_biotype:protein_coding gene_symbol:CAPN5 description:calpain 5 [Source:NCBI gene;Acc:100524513]	2	2	78.3	7.83	119.9	103.1	115.1	83.4	94.1	84.4	112.7	87.3	1.29095	0.0137146
ENSSSCP00000006990.4	pep chromosome:Sscrofa11.1:4:95549831:95572935:1 gene:ENSSSCG00000006556.4 transcript:ENSSSCT00000007183.4 gene_biotype:protein_coding transcript_biotype:protein_coding gene_symbol:TPM3 description:tropomyosin 3 [Source:NCBI gene;Acc:414388]	24	3	26.4	4.78	110.1	124.1	102.8	80.2	92.6	90.3	112.333	87.7	1.28088	0.0281483
ENSSSCP00000038433.2	pep chromosome:Sscrofa11.1:1:14908115:15017001:-1 gene:ENSSSCG00000031733.2 transcript:ENSSSCT00000063559.2 gene_biotype:protein_coding transcript_biotype:protein_coding gene_symbol:AKAP12 description:A-kinase anchoring protein 12 [Source:NCBI gene;Acc:100152595]	66	66	179.9	4.37	116.6	103	116.5	82.1	88.5	93.4	112.033	88	1.27311	0.0125534
ENSSSCP00000064716.1	pep chromosome:Sscrofa11.1:2:151102142:151147634:-1 gene:ENSSSCG00000014441.4 transcript:ENSSSCT00000087092.1 gene_biotype:protein_coding transcript_biotype:protein_coding gene_symbol:CSF1R description:colony stimulating factor 1 receptor [Source:NCBI gene;Acc:100517086]	4	4	115.7	6.92	113.4	106.3	115.3	73.5	99.4	92.2	111.667	88.3667	1.26367	0.0466336
ENSSSCP00000072580.1	pep chromosome:Sscrofa11.1:6:47990237:48000590:-1 gene:ENSSSCG00000040981.2 transcript:ENSSSCT00000075681.1 gene_biotype:protein_coding transcript_biotype:protein_coding gene_symbol:GMFG description:glia maturation factor gamma [Source:NCBI gene;Acc:100515973]	3	2	23.1	6.16	110.2	115.7	108.7	77.3	97.2	90.8	111.533	88.4333	1.26121	0.0207929
ENSSSCP00000036690.1	pep chromosome:Sscrofa11.1:13:50509748:50538967:1 gene:ENSSSCG00000033154.2 transcript:ENSSSCT00000037977.2 gene_biotype:protein_coding transcript_biotype:protein_coding gene_symbol:ARL6IP5 description:ADP ribosylation factor like GTPase 6 interacting protein 5 [Source:NCBI gene;Acc:595127]	5	5	21.5	9.52	105	107.5	120.9	84.3	88.3	94	111.133	88.8667	1.25056	0.0172684
ENSSSCP00000025103.2	pep chromosome:Sscrofa11.1:7:92550007:92644842:-1 gene:ENSSSCG00000036702.2 transcript:ENSSSCT00000027004.3 gene_biotype:protein_coding transcript_biotype:protein_coding gene_symbol:ACTN1 description:actinin alpha 1 [Source:NCBI gene;Acc:100513412]	37	22	102.3	5.63	107.2	101.3	122.9	84.3	96.7	87.5	110.467	89.5	1.23426	0.0479299
ENSSSCP00000048828.2	pep chromosome:Sscrofa11.1:3:49363555:49448459:1 gene:ENSSSCG00000008147.4 transcript:ENSSSCT00000046834.2 gene_biotype:protein_coding transcript_biotype:protein_coding gene_symbol:FHL2 description:four and a half LIM domains 2 [Source:NCBI gene;Acc:100513532]	2	2	37.9	7.33	121.7	107.9	101.3	88.7	94.7	85.8	110.3	89.7333	1.2292	0.0349542
ENSSSCP00000008456.3	pep chromosome:Sscrofa11.1:3:37323725:37340401:-1 gene:ENSSSCG00000007919.4 transcript:ENSSSCT00000008679.4 gene_biotype:protein_coding transcript_biotype:protein_coding description:ALG1 chitobiosyldiphosphodolichol beta-mannosyltransferase [Source:NCBI gene;Acc:100524193]	2	2	52.7	7.47	100.3	110.8	118.8	89.8	92.1	88.2	109.967	90.0333	1.2214	0.0219492
ENSSSCP00000035634.2	pep chromosome:Sscrofa11.1:14:74734189:74750329:-1 gene:ENSSSCG00000010281.4 transcript:ENSSSCT00000062947.2 gene_biotype:protein_coding transcript_biotype:protein_coding gene_symbol:PSAP description:prosaposin [Source:NCBI gene;Acc:100153167]	14	14	63	4.96	117.6	100.1	110.2	87.2	90.1	94.7	109.3	90.6667	1.20551	0.0279283
ENSSSCP00000042833.2	pep chromosome:Sscrofa11.1:13:18464104:18485450:-1 gene:ENSSSCG00000038362.2 transcript:ENSSSCT00000043636.2 gene_biotype:protein_coding transcript_biotype:protein_coding description:CKLF like MARVEL transmembrane domain containing 6 [Source:NCBI gene;Acc:100511532]	1	1	16.1	9.92	106.7	114.3	107	84.9	86.9	100.3	109.333	90.7	1.20544	0.0265868
ENSSSCP00000056573.1	pep chromosome:Sscrofa11.1:X:89760865:89837678:-1 gene:ENSSSCG00000012583.5 transcript:ENSSSCT00000051623.2 gene_biotype:protein_coding transcript_biotype:protein_coding gene_symbol:ACSL4 description:acyl-CoA synthetase long chain family member 4 [Source:NCBI gene;Acc:448980]	1	1	79.2	8.29	108.7	103.7	115.3	89.6	89.7	93	109.233	90.7667	1.20345	0.00644313
ENSSSCP00000034039.2	pep chromosome:Sscrofa11.1:7:47759431:47778894:-1 gene:ENSSSCG00000032498.2 transcript:ENSSSCT00000061403.2 gene_biotype:protein_coding transcript_biotype:protein_coding gene_symbol:IDH3A description:isocitrate dehydrogenase (NAD(+)) 3 catalytic subunit alpha [Source:NCBI gene;Acc:100157242]	10	10	37.4	6.44	91.8	88.1	92.6	112.1	104.4	111	90.8333	109.167	0.832061	0.00272158
ENSSSCP00000073673.1	pep chromosome:Sscrofa11.1:1:130895552:130929674:-1 gene:ENSSSCG00000004774.4 transcript:ENSSSCT00000067453.1 gene_biotype:protein_coding transcript_biotype:protein_coding gene_symbol:IVD description:isovaleryl-CoA dehydrogenase [Source:NCBI gene;Acc:100156047]	14	14	62.6	7.39	85.8	91.9	94.8	117.9	100.7	109	90.8333	109.2	0.831807	0.0310152
ENSSSCP00000042925.1	pep chromosome:Sscrofa11.1:11:25064656:25452585:1 gene:ENSSSCG00000029837.3 transcript:ENSSSCT00000038025.2 gene_biotype:protein_coding transcript_biotype:protein_coding gene_symbol:VWA8 description:von Willebrand factor A domain containing 8 [Source:NCBI gene;Acc:100511470]	15	15	215.6	7.12	89.3	89.3	92.5	114.8	106.6	107.5	90.3667	109.633	0.824263	0.00235923
ENSSSCP00000036865.2	pep chromosome:Sscrofa11.1:12:20758081:20764558:-1 gene:ENSSSCG00000017420.4 transcript:ENSSSCT00000048744.2 gene_biotype:protein_coding transcript_biotype:protein_coding gene_symbol:CNP description:2',3'-cyclic nucleotide 3' phosphodiesterase [Source:NCBI gene;Acc:100511587]	13	13	47.3	8.87	89.4	92.9	88.7	113.4	98.2	117.3	90.3333	109.633	0.823959	0.0318825
ENSSSCP00000037738.1	pep chromosome:Sscrofa11.1:1:182410121:182423361:-1 gene:ENSSSCG00000005040.4 transcript:ENSSSCT00000051449.2 gene_biotype:protein_coding transcript_biotype:protein_coding gene_symbol:GNPNAT1 description:glucosamine-phosphate N-acetyltransferase 1 [Source:NCBI gene;Acc:100152942]	6	6	20.7	7.99	82.9	88	99.5	111.6	106.7	111.4	90.1333	109.9	0.82014	0.0186507
ENSSSCP00000004865.4	pep chromosome:Sscrofa11.1:1:99280800:99311020:-1 gene:ENSSSCG00000004510.4 transcript:ENSSSCT00000004982.4 gene_biotype:protein_coding transcript_biotype:protein_coding gene_symbol:ACAA2 description:acetyl-CoA acyltransferase 2 [Source:NCBI gene;Acc:100312959]	18	18	42	8.21	89.9	94.6	85.3	114.6	100.3	115.4	89.9333	110.1	0.816833	0.0226308
ENSSSCP00000048575.1	pep chromosome:Sscrofa11.1:7:19502627:19510839:1 gene:ENSSSCG00000036411.2 transcript:ENSSSCT00000051683.2 gene_biotype:protein_coding transcript_biotype:protein_coding gene_symbol:ACOT13 description:acyl-CoA thioesterase 13 [Source:NCBI gene;Acc:100514587]	2	2	15.2	8.34	94.4	88.6	86.5	106.1	104.2	120.2	89.8333	110.167	0.815431	0.0217888
ENSSSCP00000002556.2	pep chromosome:Sscrofa11.1:7:97357952:97381841:-1 gene:ENSSSCG00000002357.4 transcript:ENSSSCT00000002621.4 gene_biotype:protein_coding transcript_biotype:protein_coding gene_symbol:ALDH6A1 description:aldehyde dehydrogenase 6 family member A1 [Source:NCBI gene;Acc:100153301]	22	22	57.7	8.24	85.3	93.5	90.4	115.2	103.3	112.4	89.7333	110.3	0.813539	0.00886277
ENSSSCP00000062904.1	pep chromosome:Sscrofa11.1:15:94794115:94941235:-1 gene:ENSSSCG00000016049.4 transcript:ENSSSCT00000089886.1 gene_biotype:protein_coding transcript_biotype:protein_coding gene_symbol:HIBCH description:3-hydroxyisobutyryl-CoA hydrolase [Source:NCBI gene;Acc:100514687]	7	7	43.2	6.7	81	93	94.7	108.7	109	113.6	89.5667	110.433	0.811047	0.0104777
ENSSSCP00000021984.2	pep chromosome:Sscrofa11.1:1:66308749:66346572:-1 gene:ENSSSCG00000004349.4 transcript:ENSSSCT00000028667.3 gene_biotype:protein_coding transcript_biotype:protein_coding gene_symbol:FAXC description:coenzyme Q3, methyltransferase [Source:NCBI gene;Acc:100152047]	4	4	44.7	7.85	90.2	88.9	89.4	112.9	111.9	106.6	89.5	110.467	0.810199	0.000459969
ENSSSCP00000034512.2	pep chromosome:Sscrofa11.1:12:5450906:5479544:1 gene:ENSSSCG00000017198.4 transcript:ENSSSCT00000050201.2 gene_biotype:protein_coding transcript_biotype:protein_coding gene_symbol:ACOX1 description:acyl-CoA oxidase 1 [Source:NCBI gene;Acc:100113422]	15	2	74.4	8.02	87.9	92	88	122.2	107.8	102.2	89.3	110.733	0.806442	0.024693
ENSSSCP00000011212.3	pep chromosome:Sscrofa11.1:14:108959137:108986726:1 gene:ENSSSCG00000010523.4 transcript:ENSSSCT00000011513.4 gene_biotype:protein_coding transcript_biotype:protein_coding gene_symbol:HOGA1 description:4-hydroxy-2-oxoglutarate aldolase 1 [Source:NCBI gene;Acc:100153961]	4	4	35.4	8.24	84	87.6	96.3	121	102.6	108.6	89.3	110.733	0.806442	0.0304795
ENSSSCP00000068993.1	pep chromosome:Sscrofa11.1:6:71827044:71835018:1 gene:ENSSSCG00000022401.3 transcript:ENSSSCT00000083793.1 gene_biotype:protein_coding transcript_biotype:protein_coding description:angiotensin II receptor associated protein [Source:NCBI gene;Acc:100524812]	1	1	29.6	8.21	88.9	87.9	90.8	119.4	109.7	103.4	89.2	110.833	0.804812	0.0102364
ENSSSCP00000011571.3	pep chromosome:Sscrofa11.1:10:13735170:13773071:1 gene:ENSSSCG00000010853.4 transcript:ENSSSCT00000011875.4 gene_biotype:protein_coding transcript_biotype:protein_coding gene_symbol:EPHX1 description:epoxide hydrolase 1 [Source:NCBI gene;Acc:397639]	16	16	52.2	7.62	81.8	91.8	93.8	106.1	102.3	124.3	89.1333	110.9	0.803727	0.0481654
ENSSSCP00000055467.2	pep chromosome:Sscrofa11.1:1:98133426:98452893:1 gene:ENSSSCG00000004506.4 transcript:ENSSSCT00000052813.2 gene_biotype:protein_coding transcript_biotype:protein_coding gene_symbol:CTIF description:cap binding complex dependent translation initiation factor [Source:NCBI gene;Acc:100152137]	1	1	68.7	6.32	94.3	79.8	92.9	116.4	105.7	110.9	89	111	0.801802	0.0166799
ENSSSCP00000036081.2	pep chromosome:Sscrofa11.1:13:73109927:73254981:-1 gene:ENSSSCG00000031557.2 transcript:ENSSSCT00000058716.2 gene_biotype:protein_coding transcript_biotype:protein_coding gene_symbol:CHCHD6 description:coiled-coil-helix-coiled-coil-helix domain containing 6 [Source:NCBI gene;Acc:100624760]	5	5	25.5	8.02	84.6	96	86	119.1	107.7	106.7	88.8667	111.167	0.7994	0.0141174
ENSSSCP00000032075.1	pep chromosome:Sscrofa11.1:4:30735853:31400997:-1 gene:ENSSSCG00000006037.4 transcript:ENSSSCT00000061455.2 gene_biotype:protein_coding transcript_biotype:protein_coding gene_symbol:OXR1 description:oxidation resistance 1 [Source:NCBI gene;Acc:100153332]	5	5	98	5.4	87.5	89.8	88.1	115.4	107.7	111.5	88.4667	111.533	0.793186	0.000581552
ENSSSCP00000064111.1	pep chromosome:Sscrofa11.1:13:77217480:77316568:1 gene:ENSSSCG00000011653.4 transcript:ENSSSCT00000078566.1 gene_biotype:protein_coding transcript_biotype:protein_coding gene_symbol:PCCB description:propionyl-CoA carboxylase subunit beta [Source:NCBI gene;Acc:100158147]	18	18	60.8	7.62	86.4	91.3	86.9	128	105.8	101.6	88.2	111.8	0.788909	0.0473067
ENSSSCP00000011531.4	pep chromosome:Sscrofa11.1:10:8946493:9014498:1 gene:ENSSSCG00000010817.4 transcript:ENSSSCT00000011834.4 gene_biotype:protein_coding transcript_biotype:protein_coding gene_symbol:LYPLAL1 description:lysophospholipase like 1 [Source:NCBI gene;Acc:100515402]	1	1	28	6.6	79.9	90.7	93.8	116.4	101.5	117.5	88.1333	111.8	0.788312	0.023736
ENSSSCP00000023921.3	pep chromosome:Sscrofa11.1:6:81611523:81630530:-1 gene:ENSSSCG00000026025.3 transcript:ENSSSCT00000027923.3 gene_biotype:protein_coding transcript_biotype:protein_coding gene_symbol:HMGCL description:3-hydroxy-3-methylglutaryl-CoA lyase [Source:NCBI gene;Acc:100621218]	5	5	39.7	9.44	86.9	98.1	79.2	124.6	103.4	107.7	88.0667	111.9	0.787012	0.048349
ENSSSCP00000064826.1	pep chromosome:Sscrofa11.1:5:63708010:63756476:1 gene:ENSSSCG00000027205.3 transcript:ENSSSCT00000082639.1 gene_biotype:protein_coding transcript_biotype:protein_coding gene_symbol:LPCAT3 description:lysophosphatidylcholine acyltransferase 3 [Source:NCBI gene;Acc:100627653]	4	4	56	8.92	88.2	87.9	88	126	96.7	113.3	88.0333	112	0.786012	0.0475827
ENSSSCP00000029501.3	pep chromosome:Sscrofa11.1:13:133970984:134000278:1 gene:ENSSSCG00000011848.5 transcript:ENSSSCT00000034535.3 gene_biotype:protein_coding transcript_biotype:protein_coding gene_symbol:TFRC description:transferrin receptor [Source:NCBI gene;Acc:397062]	1	1	88.9	6.1	86	83.8	92.7	121.5	100.1	116	87.5	112.533	0.777547	0.0227409
ENSSSCP00000036058.1	pep chromosome:Sscrofa11.1:6:59274386:59292765:-1 gene:ENSSSCG00000038287.2 transcript:ENSSSCT00000060064.2 gene_biotype:protein_coding transcript_biotype:protein_coding gene_symbol:RDH13 description:retinol dehydrogenase 13 [Source:NCBI gene;Acc:110261049]	1	1	36.2	7.31	94.8	76.1	90.5	123	110	105.6	87.1333	112.867	0.772002	0.0287589
ENSSSCP00000073219.1	pep chromosome:Sscrofa11.1:9:39790561:39803143:1 gene:ENSSSCG00000015034.4 transcript:ENSSSCT00000069328.1 gene_biotype:protein_coding transcript_biotype:protein_coding gene_symbol:SDHD description:succinate dehydrogenase complex subunit D [Source:NCBI gene;Acc:100048954]	2	2	16.7	9.1	78.6	90.7	91.9	117	114.1	107.7	87.0667	112.933	0.770956	0.0069175
ENSSSCP00000050745.2	pep chromosome:Sscrofa11.1:13:34892339:34906378:1 gene:ENSSSCG00000011450.4 transcript:ENSSSCT00000040540.2 gene_biotype:protein_coding transcript_biotype:protein_coding gene_symbol:ITIH1 description:inter-alpha-trypsin inhibitor heavy chain 1 [Source:NCBI gene;Acc:396963]	17	5	102.6	7.85	101.7	84.6	74.3	104.1	115.9	119.3	86.8667	113.1	0.768052	0.0466602
ENSSSCP00000005884.2	pep chromosome:Sscrofa11.1:1:254939149:254943056:1 gene:ENSSSCG00000005488.4 transcript:ENSSSCT00000006034.4 gene_biotype:protein_coding transcript_biotype:protein_coding description:orosomucoid 1 [Source:NCBI gene;Acc:396901]	11	11	23	6.21	73.2	91.5	95.3	117.1	107.7	115.2	86.6667	113.333	0.764706	0.0226956
ENSSSCP00000033794.1	pep chromosome:Sscrofa11.1:9:38375984:38404832:1 gene:ENSSSCG00000035945.2 transcript:ENSSSCT00000065716.2 gene_biotype:protein_coding transcript_biotype:protein_coding gene_symbol:FDX1 description:ferredoxin 1 [Source:NCBI gene;Acc:397133]	3	3	19.9	5.26	84.2	81.8	93.9	121.7	114.2	104.2	86.6333	113.367	0.764187	0.0130505
ENSSSCP00000052912.1	pep chromosome:Sscrofa11.1:7:43597292:43624609:-1 gene:ENSSSCG00000001732.4 transcript:ENSSSCT00000040446.2 gene_biotype:protein_coding transcript_biotype:protein_coding gene_symbol:MMUT description:methylmalonyl-CoA mutase [Source:NCBI gene;Acc:399535]	14	14	83.2	8.06	89.1	78.1	87.2	128.6	110.2	106.8	84.8	115.2	0.736111	0.0159523
ENSSSCP00000014399.3	pep chromosome:Sscrofa11.1:2:72431499:72528112:1 gene:ENSSSCG00000013551.4 transcript:ENSSSCT00000014800.4 gene_biotype:protein_coding transcript_biotype:protein_coding gene_symbol:C3 description:complement C3 [Source:NCBI gene;Acc:397072]	78	78	186.9	6.54	89.9	78.1	84.9	121.7	113.7	111.7	84.3	115.7	0.728608	0.00238023
ENSSSCP00000059939.1	pep chromosome:Sscrofa11.1:9:12078992:12113631:-1 gene:ENSSSCG00000014881.4 transcript:ENSSSCT00000089903.1 gene_biotype:protein_coding transcript_biotype:protein_coding gene_symbol:CLNS1A description:chloride nucleotide-sensitive channel 1A [Source:NCBI gene;Acc:100623383]	1	1	26.1	4.16	83.1	86.4	83.1	127.1	119.6	100.7	84.2	115.8	0.727116	0.0163412
ENSSSCP00000045481.2	pep chromosome:Sscrofa11.1:4:122837525:122929454:-1 gene:ENSSSCG00000028620.3 transcript:ENSSSCT00000042215.2 gene_biotype:protein_coding transcript_biotype:protein_coding gene_symbol:ABCD3 description:ATP binding cassette subfamily D member 3 [Source:NCBI gene;Acc:100626343]	8	8	75.4	9.33	83.4	82.2	85.5	111.2	115.5	122.3	83.7	116.333	0.719484	0.000637987
ENSSSCP00000041662.2	pep chromosome:Sscrofa11.1:17:38885139:38899140:1 gene:ENSSSCG00000034045.2 transcript:ENSSSCT00000048785.2 gene_biotype:protein_coding transcript_biotype:protein_coding gene_symbol:ERGIC3 description:ERGIC and golgi 3 [Source:NCBI gene;Acc:100157082]	2	2	51.2	6.52	76.7	87.6	85.3	126.1	109.4	115	83.2	116.833	0.712126	0.00474727
ENSSSCP00000025827.2	pep chromosome:Sscrofa11.1:9:36525309:36545633:1 gene:ENSSSCG00000026153.3 transcript:ENSSSCT00000028484.3 gene_biotype:protein_coding transcript_biotype:protein_coding gene_symbol:ACAT1 description:acetyl-CoA acetyltransferase 1 [Source:NCBI gene;Acc:100626793]	21	21	45.3	8.87	81.8	85.3	81.8	140.2	105.6	105.4	82.9667	117.067	0.708713	0.0426771
ENSSSCP00000002089.3	pep chromosome:Sscrofa11.1:7:59349674:59352807:-1 gene:ENSSSCG00000001910.5 transcript:ENSSSCT00000002139.5 gene_biotype:protein_coding transcript_biotype:protein_coding gene_symbol:ISLR description:immunoglobulin superfamily containing leucine rich repeat [Source:NCBI gene;Acc:100152082]	3	3	46.7	5.5	74.8	77.8	94.7	113.2	126	113.5	82.4333	117.567	0.701162	0.00938902
ENSSSCP00000070840.1	pep chromosome:Sscrofa11.1:1:253124512:253195041:1 gene:ENSSSCG00000005467.5 transcript:ENSSSCT00000091367.1 gene_biotype:protein_coding transcript_biotype:protein_coding gene_symbol:HSDL2 description:hydroxysteroid dehydrogenase like 2 [Source:NCBI gene;Acc:100155587]	11	11	45.3	7.85	80.8	79.1	86	138.4	102.5	113.2	81.9667	118.033	0.694437	0.0291989
ENSSSCP00000067080.1	pep chromosome:Sscrofa11.1:16:47917291:47985608:1 gene:ENSSSCG00000016971.4 transcript:ENSSSCT00000067179.1 gene_biotype:protein_coding transcript_biotype:protein_coding gene_symbol:MCCC2 description:methylcrotonoyl-CoA carboxylase 2 [Source:NCBI gene;Acc:100518224]	12	2	54.4	8.25	81.4	85.2	76.9	142.8	110.4	103.3	81.1667	118.833	0.683029	0.0384152
ENSSSCP00000071547.1	pep chromosome:Sscrofa11.1:5:62742315:62757519:1 gene:ENSSSCG00000031712.2 transcript:ENSSSCT00000081063.1 gene_biotype:protein_coding transcript_biotype:protein_coding gene_symbol:MFAP5 description:microfibril associated protein 5 [Source:NCBI gene;Acc:100512231]	4	4	26.2	6.74	87.1	65.2	83.3	114.8	121.4	128.2	78.5333	121.467	0.646542	0.00527736
ENSSSCP00000037275.1	pep chromosome:Sscrofa11.1:8:110468751:110504912:-1 gene:ENSSSCG00000009128.4 transcript:ENSSSCT00000040840.2 gene_biotype:protein_coding transcript_biotype:protein_coding gene_symbol:AP1AR description:family with sequence similarity 241 member A [Source:NCBI gene;Acc:102158861]	1	1	15.1	4.61	66.4	68.6	91.9	142.8	134.6	95.8	75.6333	124.4	0.607985	0.0427298
ENSSSCP00000065623.1	pep chromosome:Sscrofa11.1:2:131152127:131370466:-1 gene:ENSSSCG00000014256.4 transcript:ENSSSCT00000085839.1 gene_biotype:protein_coding transcript_biotype:protein_coding gene_symbol:FBN2 description:fibrillin 2 [Source:NCBI gene;Acc:100048956]	10	4	313.9	4.86	76.4	64.6	77.9	102.8	157.8	120.4	72.9667	127	0.574541	0.0321183
ENSSSCP00000058065.2	pep chromosome:Sscrofa11.1:14:48976970:49004643:1 gene:ENSSSCG00000038719.2 transcript:ENSSSCT00000063237.2 gene_biotype:protein_coding transcript_biotype:protein_coding	2	2	12.8	7.2	75.5	50.3	68.1	141.8	145.1	119.2	64.6333	135.367	0.477469	0.00306205

## Sheet: Table S7b
Table S7b. The 69 significantly GO terms of DAPs.
GO-ID	description	Input number	Input all	Background number	Background all	P-Value	Corrected P-Value	Protein info
GO:0006635	fatty acid beta-oxidation	6	60	28	3949	2.77e-06	0.000928427	ENSSSCP00000004865.4, ENSSSCP00000045481.2, ENSSSCP00000034512.2, ENSSSCP00000025827.2, ENSSSCP00000073673.1, ENSSSCP00000013693.4
GO:0072329	monocarboxylic acid catabolic process	7	60	44	3949	3.23e-06	0.000928427	ENSSSCP00000034512.2, ENSSSCP00000004865.4, ENSSSCP00000045481.2, ENSSSCP00000073673.1, ENSSSCP00000011212.3, ENSSSCP00000013693.4, ENSSSCP00000025827.2
GO:0016054	organic acid catabolic process	9	60	86	3949	4.31e-06	0.000928427	ENSSSCP00000034512.2, ENSSSCP00000025827.2, ENSSSCP00000002556.2, ENSSSCP00000013693.4, ENSSSCP00000011212.3, ENSSSCP00000045481.2, ENSSSCP00000004865.4, ENSSSCP00000062904.1, ENSSSCP00000073673.1
GO:0046395	carboxylic acid catabolic process	9	60	86	3949	4.31e-06	0.000928427	ENSSSCP00000004865.4, ENSSSCP00000045481.2, ENSSSCP00000073673.1, ENSSSCP00000062904.1, ENSSSCP00000034512.2, ENSSSCP00000011212.3, ENSSSCP00000013693.4, ENSSSCP00000025827.2, ENSSSCP00000002556.2
GO:0019395	fatty acid oxidation	6	60	34	3949	9.22e-06	0.00114489	ENSSSCP00000034512.2, ENSSSCP00000045481.2, ENSSSCP00000004865.4, ENSSSCP00000013693.4, ENSSSCP00000073673.1, ENSSSCP00000025827.2
GO:0009083	branched-chain amino acid catabolic process	4	60	10	3949	9.45e-06	0.00114489	ENSSSCP00000073673.1, ENSSSCP00000025827.2, ENSSSCP00000002556.2, ENSSSCP00000062904.1
GO:0044282	small molecule catabolic process	10	60	121	3949	1.04e-05	0.00114489	ENSSSCP00000004865.4, ENSSSCP00000045481.2, ENSSSCP00000062904.1, ENSSSCP00000073673.1, ENSSSCP00000003343.3, ENSSSCP00000034512.2, ENSSSCP00000002556.2, ENSSSCP00000025827.2, ENSSSCP00000011212.3, ENSSSCP00000013693.4
GO:0034440	lipid oxidation	6	60	35	3949	1.1e-05	0.00114489	ENSSSCP00000025827.2, ENSSSCP00000073673.1, ENSSSCP00000013693.4, ENSSSCP00000004865.4, ENSSSCP00000045481.2, ENSSSCP00000034512.2
GO:0006629	lipid metabolic process	15	60	281	3949	1.2e-05	0.00114489	ENSSSCP00000033794.1, ENSSSCP00000004865.4, ENSSSCP00000064826.1, ENSSSCP00000045481.2, ENSSSCP00000064716.1, ENSSSCP00000073673.1, ENSSSCP00000035634.2, ENSSSCP00000003343.3, ENSSSCP00000034512.2, ENSSSCP00000056573.1, ENSSSCP00000023921.3, ENSSSCP00000013693.4, ENSSSCP00000036058.1, ENSSSCP00000011571.3, ENSSSCP00000025827.2
GO:0009081	branched-chain amino acid metabolic process	4	60	11	3949	1.47e-05	0.00126574	ENSSSCP00000025827.2, ENSSSCP00000002556.2, ENSSSCP00000062904.1, ENSSSCP00000073673.1
GO:0009062	fatty acid catabolic process	6	60	39	3949	2.11e-05	0.00165244	ENSSSCP00000004865.4, ENSSSCP00000045481.2, ENSSSCP00000034512.2, ENSSSCP00000025827.2, ENSSSCP00000073673.1, ENSSSCP00000013693.4
GO:0016289	CoA hydrolase activity	3	60	5	3949	3.26e-05	0.00234513	ENSSSCP00000062904.1, ENSSSCP00000004865.4, ENSSSCP00000048575.1
GO:0016042	lipid catabolic process	8	60	86	3949	3.7e-05	0.00245646	ENSSSCP00000013693.4, ENSSSCP00000025827.2, ENSSSCP00000034512.2, ENSSSCP00000003343.3, ENSSSCP00000073673.1, ENSSSCP00000035634.2, ENSSSCP00000045481.2, ENSSSCP00000004865.4
GO:0044255	cellular lipid metabolic process	13	60	238	3949	4.05e-05	0.00249145	ENSSSCP00000056573.1, ENSSSCP00000003343.3, ENSSSCP00000034512.2, ENSSSCP00000025827.2, ENSSSCP00000011571.3, ENSSSCP00000036058.1, ENSSSCP00000013693.4, ENSSSCP00000064716.1, ENSSSCP00000045481.2, ENSSSCP00000004865.4, ENSSSCP00000064826.1, ENSSSCP00000035634.2, ENSSSCP00000073673.1
GO:0044242	cellular lipid catabolic process	7	60	66	3949	5.06e-05	0.00290756	ENSSSCP00000025827.2, ENSSSCP00000035634.2, ENSSSCP00000073673.1, ENSSSCP00000013693.4, ENSSSCP00000004865.4, ENSSSCP00000045481.2, ENSSSCP00000034512.2
GO:0044281	small molecule metabolic process	20	60	536	3949	6.71e-05	0.0036166	ENSSSCP00000003343.3, ENSSSCP00000034512.2, ENSSSCP00000011212.3, ENSSSCP00000036058.1, ENSSSCP00000050745.2, ENSSSCP00000052912.1, ENSSSCP00000045481.2, ENSSSCP00000073673.1, ENSSSCP00000021984.2, ENSSSCP00000056573.1, ENSSSCP00000037738.1, ENSSSCP00000023921.3, ENSSSCP00000013693.4, ENSSSCP00000002556.2, ENSSSCP00000025827.2, ENSSSCP00000011571.3, ENSSSCP00000033794.1, ENSSSCP00000004865.4, ENS…
GO:1901568	fatty acid derivative metabolic process	5	60	32	3949	0.000100538	0.00481466	ENSSSCP00000025827.2, ENSSSCP00000011571.3, ENSSSCP00000034512.2, ENSSSCP00000056573.1, ENSSSCP00000023921.3
GO:1901606	alpha-amino acid catabolic process	5	60	32	3949	0.000100538	0.00481466	ENSSSCP00000025827.2, ENSSSCP00000002556.2, ENSSSCP00000062904.1, ENSSSCP00000073673.1, ENSSSCP00000011212.3
GO:0006631	fatty acid metabolic process	8	60	102	3949	0.000126643	0.00574561	ENSSSCP00000056573.1, ENSSSCP00000034512.2, ENSSSCP00000025827.2, ENSSSCP00000011571.3, ENSSSCP00000013693.4, ENSSSCP00000045481.2, ENSSSCP00000004865.4, ENSSSCP00000073673.1
GO:0009063	cellular amino acid catabolic process	5	60	37	3949	0.000205317	0.00884914	ENSSSCP00000073673.1, ENSSSCP00000011212.3, ENSSSCP00000025827.2, ENSSSCP00000062904.1, ENSSSCP00000002556.2
GO:0030258	lipid modification	6	60	61	3949	0.000276903	0.0112156	ENSSSCP00000073673.1, ENSSSCP00000013693.4, ENSSSCP00000025827.2, ENSSSCP00000034512.2, ENSSSCP00000004865.4, ENSSSCP00000045481.2
GO:0019752	carboxylic acid metabolic process	13	60	288	3949	0.000286245	0.0112156	ENSSSCP00000025827.2, ENSSSCP00000002556.2, ENSSSCP00000050745.2, ENSSSCP00000011571.3, ENSSSCP00000011212.3, ENSSSCP00000013693.4, ENSSSCP00000034512.2, ENSSSCP00000056573.1, ENSSSCP00000062904.1, ENSSSCP00000073673.1, ENSSSCP00000004865.4, ENSSSCP00000045481.2, ENSSSCP00000052912.1
GO:0043524	negative regulation of neuron apoptotic process	4	60	23	3949	0.000343716	0.0128819	ENSSSCP00000035292.2, ENSSSCP00000002653.4, ENSSSCP00000003343.3, ENSSSCP00000032075.1
GO:0043436	oxoacid metabolic process	13	60	295	3949	0.000362827	0.0130315	ENSSSCP00000013693.4, ENSSSCP00000011212.3, ENSSSCP00000002556.2, ENSSSCP00000025827.2, ENSSSCP00000050745.2, ENSSSCP00000011571.3, ENSSSCP00000056573.1, ENSSSCP00000034512.2, ENSSSCP00000073673.1, ENSSSCP00000062904.1, ENSSSCP00000052912.1, ENSSSCP00000045481.2, ENSSSCP00000004865.4
GO:0016747	transferase activity, transferring acyl groups other than amino-acyl groups	5	60	42	3949	0.000378039	0.0130348	ENSSSCP00000013693.4, ENSSSCP00000025827.2, ENSSSCP00000037738.1, ENSSSCP00000004865.4, ENSSSCP00000064826.1
GO:0006082	organic acid metabolic process	13	60	300	3949	0.000427743	0.0141813	ENSSSCP00000052912.1, ENSSSCP00000004865.4, ENSSSCP00000045481.2, ENSSSCP00000073673.1, ENSSSCP00000062904.1, ENSSSCP00000034512.2, ENSSSCP00000056573.1, ENSSSCP00000011212.3, ENSSSCP00000013693.4, ENSSSCP00000025827.2, ENSSSCP00000050745.2, ENSSSCP00000002556.2, ENSSSCP00000011571.3
GO:1901605	alpha-amino acid metabolic process	6	60	67	3949	0.000463729	0.014805	ENSSSCP00000011212.3, ENSSSCP00000073673.1, ENSSSCP00000002556.2, ENSSSCP00000025827.2, ENSSSCP00000062904.1, ENSSSCP00000052912.1
GO:0005739	mitochondrion	18	60	526	3949	0.000532399	0.0159161	ENSSSCP00000004865.4, ENSSSCP00000033794.1, ENSSSCP00000034039.2, ENSSSCP00000062904.1, ENSSSCP00000042925.1, ENSSSCP00000023921.3, ENSSSCP00000048575.1, ENSSSCP00000056573.1, ENSSSCP00000025827.2, ENSSSCP00000036081.2, ENSSSCP00000002556.2, ENSSSCP00000013693.4, ENSSSCP00000073219.1, ENSSSCP00000070840.1, ENSSSCP00000021984.2, ENSSSCP00000073673.1, ENSSSCP00000064111.1, ENSSSCP00000036058.1
GO:0032787	monocarboxylic acid metabolic process	9	60	158	3949	0.000535459	0.0159161	ENSSSCP00000004865.4, ENSSSCP00000045481.2, ENSSSCP00000073673.1, ENSSSCP00000034512.2, ENSSSCP00000056573.1, ENSSSCP00000011212.3, ENSSSCP00000013693.4, ENSSSCP00000025827.2, ENSSSCP00000011571.3
GO:0016790	thiolester hydrolase activity	3	60	12	3949	0.000665637	0.0176189	ENSSSCP00000062904.1, ENSSSCP00000004865.4, ENSSSCP00000048575.1
GO:0046950	cellular ketone body metabolic process	2	60	3	3949	0.000674504	0.0176189	ENSSSCP00000023921.3, ENSSSCP00000025827.2
GO:1902224	ketone body metabolic process	2	60	3	3949	0.000674504	0.0176189	ENSSSCP00000025827.2, ENSSSCP00000023921.3
GO:0003985	acetyl-CoA C-acetyltransferase activity	2	60	3	3949	0.000674504	0.0176189	ENSSSCP00000025827.2, ENSSSCP00000004865.4
GO:0043523	regulation of neuron apoptotic process	4	60	29	3949	0.000861224	0.0218346	ENSSSCP00000002653.4, ENSSSCP00000003343.3, ENSSSCP00000032075.1, ENSSSCP00000035292.2
GO:0042803	protein homodimerization activity	9	60	171	3949	0.000951723	0.0229565	ENSSSCP00000052912.1, ENSSSCP00000045481.2, ENSSSCP00000064716.1, ENSSSCP00000035292.2, ENSSSCP00000035634.2, ENSSSCP00000003343.3, ENSSSCP00000025103.2, ENSSSCP00000011212.3, ENSSSCP00000029501.3
GO:0044248	cellular catabolic process	15	60	413	3949	0.00095874	0.0229565	ENSSSCP00000011571.3, ENSSSCP00000025827.2, ENSSSCP00000002556.2, ENSSSCP00000013693.4, ENSSSCP00000011212.3, ENSSSCP00000002653.4, ENSSSCP00000034512.2, ENSSSCP00000055467.2, ENSSSCP00000062904.1, ENSSSCP00000035634.2, ENSSSCP00000024395.2, ENSSSCP00000073673.1, ENSSSCP00000036865.2, ENSSSCP00000045481.2, ENSSSCP00000004865.4
GO:0016746	transferase activity, transferring acyl groups	5	60	54	3949	0.00122254	0.0267783	ENSSSCP00000037738.1, ENSSSCP00000004865.4, ENSSSCP00000064826.1, ENSSSCP00000013693.4, ENSSSCP00000025827.2
GO:1901575	organic substance catabolic process	15	60	426	3949	0.00132268	0.0267783	ENSSSCP00000013693.4, ENSSSCP00000011212.3, ENSSSCP00000002556.2, ENSSSCP00000025827.2, ENSSSCP00000003343.3, ENSSSCP00000034512.2, ENSSSCP00000002653.4, ENSSSCP00000024395.2, ENSSSCP00000073673.1, ENSSSCP00000055467.2, ENSSSCP00000035634.2, ENSSSCP00000062904.1, ENSSSCP00000036865.2, ENSSSCP00000045481.2, ENSSSCP00000004865.4
GO:0006574	valine catabolic process	2	60	4	3949	0.00133581	0.0267783	ENSSSCP00000062904.1, ENSSSCP00000002556.2
GO:0003988	acetyl-CoA C-acyltransferase activity	2	60	4	3949	0.00133581	0.0267783	ENSSSCP00000025827.2, ENSSSCP00000004865.4
GO:0016453	C-acetyltransferase activity	2	60	4	3949	0.00133581	0.0267783	ENSSSCP00000025827.2, ENSSSCP00000004865.4
GO:0016833	oxo-acid-lyase activity	2	60	4	3949	0.00133581	0.0267783	ENSSSCP00000011212.3, ENSSSCP00000023921.3
GO:0047617	acyl-CoA hydrolase activity	2	60	4	3949	0.00133581	0.0267783	ENSSSCP00000048575.1, ENSSSCP00000004865.4
GO:0099173	postsynapse organization	3	60	16	3949	0.00162251	0.0310801	ENSSSCP00000025103.2, ENSSSCP00000003343.3, ENSSSCP00000002653.4
GO:0016407	acetyltransferase activity	3	60	16	3949	0.00162251	0.0310801	ENSSSCP00000025827.2, ENSSSCP00000004865.4, ENSSSCP00000037738.1
GO:1901215	negative regulation of neuron death	4	60	35	3949	0.00177383	0.0328859	ENSSSCP00000035292.2, ENSSSCP00000003343.3, ENSSSCP00000032075.1, ENSSSCP00000002653.4
GO:0060548	negative regulation of cell death	9	60	187	3949	0.00179308	0.0328859	ENSSSCP00000029501.3, ENSSSCP00000048828.2, ENSSSCP00000002653.4, ENSSSCP00000032075.1, ENSSSCP00000003343.3, ENSSSCP00000035634.2, ENSSSCP00000035292.2, ENSSSCP00000064716.1, ENSSSCP00000004865.4
GO:0015849	organic acid transport	4	60	36	3949	0.0019731	0.0333394	ENSSSCP00000045481.2, ENSSSCP00000036690.1, ENSSSCP00000003343.3, ENSSSCP00000035634.2
GO:0046942	carboxylic acid transport	4	60	36	3949	0.0019731	0.0333394	ENSSSCP00000045481.2, ENSSSCP00000036690.1, ENSSSCP00000003343.3, ENSSSCP00000035634.2
GO:0009056	catabolic process	16	60	491	3949	0.0020184	0.0333394	ENSSSCP00000011212.3, ENSSSCP00000002653.4, ENSSSCP00000003343.3, ENSSSCP00000034512.2, ENSSSCP00000035634.2, ENSSSCP00000024395.2, ENSSSCP00000073673.1, ENSSSCP00000045481.2, ENSSSCP00000025827.2, ENSSSCP00000011571.3, ENSSSCP00000002556.2, ENSSSCP00000013693.4, ENSSSCP00000055467.2, ENSSSCP00000062904.1, ENSSSCP00000036865.2, ENSSSCP00000004865.4
GO:0002714	positive regulation of B cell mediated immunity	2	60	5	3949	0.00220458	0.0333394	ENSSSCP00000029501.3, ENSSSCP00000014399.3
GO:0002891	positive regulation of immunoglobulin mediated immune response	2	60	5	3949	0.00220458	0.0333394	ENSSSCP00000014399.3, ENSSSCP00000029501.3
GO:0006573	valine metabolic process	2	60	5	3949	0.00220458	0.0333394	ENSSSCP00000062904.1, ENSSSCP00000002556.2
GO:0045540	regulation of cholesterol biosynthetic process	2	60	5	3949	0.00220458	0.0333394	ENSSSCP00000003343.3, ENSSSCP00000064826.1
GO:0051126	negative regulation of actin nucleation	2	60	5	3949	0.00220458	0.0333394	ENSSSCP00000072580.1, ENSSSCP00000035292.2
GO:0060343	trabecula formation	2	60	5	3949	0.00220458	0.0333394	ENSSSCP00000065623.1, ENSSSCP00000048828.2
GO:0106118	regulation of sterol biosynthetic process	2	60	5	3949	0.00220458	0.0333394	ENSSSCP00000003343.3, ENSSSCP00000064826.1
GO:0030182	neuron differentiation	7	60	126	3949	0.00269497	0.0400528	ENSSSCP00000064716.1, ENSSSCP00000014399.3, ENSSSCP00000036865.2, ENSSSCP00000056573.1, ENSSSCP00000003343.3, ENSSSCP00000035634.2, ENSSSCP00000036058.1
GO:0043066	negative regulation of apoptotic process	8	60	162	3949	0.00279543	0.0408417	ENSSSCP00000035292.2, ENSSSCP00000004865.4, ENSSSCP00000064716.1, ENSSSCP00000048828.2, ENSSSCP00000029501.3, ENSSSCP00000003343.3, ENSSSCP00000032075.1, ENSSSCP00000002653.4
GO:0007626	locomotory behavior	4	60	40	3949	0.00292585	0.0420347	ENSSSCP00000036865.2, ENSSSCP00000032075.1, ENSSSCP00000003343.3, ENSSSCP00000035634.2
GO:0070665	positive regulation of leukocyte proliferation	3	60	20	3949	0.00316324	0.042768	ENSSSCP00000035292.2, ENSSSCP00000029501.3, ENSSSCP00000064716.1
GO:0034377	plasma lipoprotein particle assembly	2	60	6	3949	0.00327458	0.042768	ENSSSCP00000064826.1, ENSSSCP00000003343.3
GO:0035337	fatty-acyl-CoA metabolic process	2	60	6	3949	0.00327458	0.042768	ENSSSCP00000056573.1, ENSSSCP00000025827.2
GO:0090181	regulation of cholesterol metabolic process	2	60	6	3949	0.00327458	0.042768	ENSSSCP00000003343.3, ENSSSCP00000064826.1
GO:0001891	phagocytic cup	2	60	6	3949	0.00327458	0.042768	ENSSSCP00000035292.2, ENSSSCP00000010045.4
GO:0016408	C-acyltransferase activity	2	60	6	3949	0.00327458	0.042768	ENSSSCP00000025827.2, ENSSSCP00000004865.4
GO:0001676	long-chain fatty acid metabolic process	3	60	21	3949	0.00365084	0.0469705	ENSSSCP00000011571.3, ENSSSCP00000013693.4, ENSSSCP00000056573.1
GO:0006520	cellular amino acid metabolic process	6	60	100	3949	0.00375808	0.047091	ENSSSCP00000073673.1, ENSSSCP00000011212.3, ENSSSCP00000025827.2, ENSSSCP00000002556.2, ENSSSCP00000062904.1, ENSSSCP00000052912.1
GO:0043069	negative regulation of programmed cell death	8	60	170	3949	0.00376946	0.047091	ENSSSCP00000035292.2, ENSSSCP00000004865.4, ENSSSCP00000064716.1, ENSSSCP00000029501.3, ENSSSCP00000048828.2, ENSSSCP00000002653.4, ENSSSCP00000003343.3, ENSSSCP00000032075.1

## Sheet: Table S7c
Table S7c.Enrichment of KEGG signaling pathway.
ko-ID	description	Input number	Background number	P value	Corrected P-Value	protein info	pathway-web
ko00280	Valine, leucine and isoleucine degradation	9	46	9.83e-09	2.65e-07	ENSSSCP00000073673.1(K00253);ENSSSCP00000004865.4(K07508);ENSSSCP00000002556.2(K00140);ENSSSCP00000062904.1(K05605);ENSSSCP00000064111.1(K01966);ENSSSCP00000023921.3(K01640);ENSSSCP00000052912.1(K01847);ENSSSCP00000025827.2(K00626);ENSSSCP00000067080.1(K01969)	http://www.genome.jp/kegg-bin/show_pathway?ko00280/K00253%09cyan/K07508%09cyan/K00140%09cyan/K05605%09cyan/K01966%09cyan/K01640%09cyan/K01847%09cyan/K00626%09cyan/K01969%09cyan
ko00640	Propanoate metabolism	6	29	2.77e-06	3.74e-05	ENSSSCP00000002556.2(K00140);ENSSSCP00000062904.1(K05605);ENSSSCP00000034512.2(K00232);ENSSSCP00000064111.1(K01966);ENSSSCP00000052912.1(K01847);ENSSSCP00000025827.2(K00626)	http://www.genome.jp/kegg-bin/show_pathway?ko00640/K00140%09cyan/K05605%09cyan/K00232%09cyan/K01966%09cyan/K01847%09cyan/K00626%09cyan
ko00071	Fatty acid degradation	5	30	6.3e-05	0.000463652	ENSSSCP00000013693.4(K08765);ENSSSCP00000056573.1(K01897);ENSSSCP00000004865.4(K07508);ENSSSCP00000034512.2(K00232);ENSSSCP00000025827.2(K00626)	http://www.genome.jp/kegg-bin/show_pathway?ko00071/K08765%09cyan/K01897%09cyan/K07508%09cyan/K00232%09cyan/K00626%09cyan
ko01200	Carbon metabolism	8	98	6.87e-05	0.000463652	ENSSSCP00000034039.2(K00030);ENSSSCP00000002556.2(K00140);ENSSSCP00000062904.1(K05605);ENSSSCP00000034512.2(K00232);ENSSSCP00000064111.1(K01966);ENSSSCP00000073219.1(K00237);ENSSSCP00000052912.1(K01847);ENSSSCP00000025827.2(K00626)	http://www.genome.jp/kegg-bin/show_pathway?ko01200/K00030%09cyan/K00140%09cyan/K05605%09cyan/K00232%09cyan/K01966%09cyan/K00237%09cyan/K01847%09cyan/K00626%09cyan
ko00630	Glyoxylate and dicarboxylate metabolism	4	23	0.000313386	0.00169228	ENSSSCP00000011212.3(K18123);ENSSSCP00000064111.1(K01966);ENSSSCP00000052912.1(K01847);ENSSSCP00000025827.2(K00626)	http://www.genome.jp/kegg-bin/show_pathway?ko00630/K18123%09cyan/K01966%09cyan/K01847%09cyan/K00626%09cyan
ko01212	Fatty acid metabolism	5	45	0.00045882	0.00206469	ENSSSCP00000013693.4(K08765);ENSSSCP00000056573.1(K01897);ENSSSCP00000004865.4(K07508);ENSSSCP00000034512.2(K00232);ENSSSCP00000025827.2(K00626)	http://www.genome.jp/kegg-bin/show_pathway?ko01212/K08765%09cyan/K01897%09cyan/K07508%09cyan/K00232%09cyan/K00626%09cyan
ko00410	beta-Alanine metabolism	3	19	0.00258419	0.00996757	ENSSSCP00000002556.2(K00140);ENSSSCP00000062904.1(K05605);ENSSSCP00000034512.2(K00232)	http://www.genome.jp/kegg-bin/show_pathway?ko00410/K00140%09cyan/K05605%09cyan/K00232%09cyan
ko00072	Synthesis and degradation of ketone bodies	2	7	0.00443218	0.0135462	ENSSSCP00000023921.3(K01640);ENSSSCP00000025827.2(K00626)	http://www.genome.jp/kegg-bin/show_pathway?ko00072/K01640%09cyan/K00626%09cyan
ko04146	Peroxisome	4	46	0.00451541	0.0135462	ENSSSCP00000056573.1(K01897);ENSSSCP00000034512.2(K00232);ENSSSCP00000023921.3(K01640);ENSSSCP00000045481.2(K05677)	http://www.genome.jp/kegg-bin/show_pathway?ko04146/K01897%09cyan/K00232%09cyan/K01640%09cyan/K05677%09cyan
ko04216	Ferroptosis	3	26	0.00645063	0.0174167	ENSSSCP00000056573.1(K01897);ENSSSCP00000064826.1(K13515);ENSSSCP00000029501.3(K06503)	http://www.genome.jp/kegg-bin/show_pathway?ko04216/K01897%09cyan/K13515%09cyan/K06503%09cyan
ko01100	Metabolic pathways	17	658	0.00811455	0.0199175	ENSSSCP00000008456.3(K03842);ENSSSCP00000056573.1(K01897);ENSSSCP00000034039.2(K00030);ENSSSCP00000073673.1(K00253);ENSSSCP00000037738.1(K00621);ENSSSCP00000004865.4(K07508);ENSSSCP00000002556.2(K00140);ENSSSCP00000062904.1(K05605);ENSSSCP00000021984.2(K00591);ENSSSCP00000034512.2(K00232);ENSSSCP00000011212.3(K18123);ENSSSCP00000064111.1(K01966);ENSSSCP00000023921.3(K01640);ENSSSCP00000073219.1(K…	http://www.genome.jp/kegg-bin/show_pathway?ko01100/K03842%09cyan/K01897%09cyan/K00030%09cyan/K00253%09cyan/K00621%09cyan/K07508%09cyan/K00140%09cyan/K05605%09cyan/K00591%09cyan/K00232%09cyan/K18123%09cyan/K01966%09cyan/K01640%09cyan/K00237%09cyan/K01847%09cyan/K00626%09cyan/K01969%09cyan
ko00650	Butanoate metabolism	2	15	0.0205465	0.0462295	ENSSSCP00000023921.3(K01640);ENSSSCP00000025827.2(K00626)	http://www.genome.jp/kegg-bin/show_pathway?ko00650/K01640%09cyan/K00626%09cyan
ko03320	PPAR signaling pathway	3	48	0.0342436	0.0711214	ENSSSCP00000013693.4(K08765);ENSSSCP00000056573.1(K01897);ENSSSCP00000034512.2(K00232)	http://www.genome.jp/kegg-bin/show_pathway?ko03320/K08765%09cyan/K01897%09cyan/K00232%09cyan
ko04640	Hematopoietic cell lineage	2	22	0.0423267	0.0816301	ENSSSCP00000064716.1(K05090);ENSSSCP00000029501.3(K06503)	http://www.genome.jp/kegg-bin/show_pathway?ko04640/K05090%09cyan/K06503%09cyan
ko04920	Adipocytokine signaling pathway	2	26	0.0573667	0.101187	ENSSSCP00000013693.4(K08765);ENSSSCP00000056573.1(K01897)	http://www.genome.jp/kegg-bin/show_pathway?ko04920/K08765%09cyan/K01897%09cyan
ko04142	Lysosome	3	60	0.0599627	0.101187	ENSSSCP00000024395.2(K01363);ENSSSCP00000002653.4(K01369);ENSSSCP00000035634.2(K12382)	http://www.genome.jp/kegg-bin/show_pathway?ko04142/K01363%09cyan/K01369%09cyan/K12382%09cyan
ko00020	Citrate cycle (TCA cycle)	2	29	0.0696907	0.110685	ENSSSCP00000034039.2(K00030);ENSSSCP00000073219.1(K00237)	http://www.genome.jp/kegg-bin/show_pathway?ko00020/K00030%09cyan/K00237%09cyan
ko04612	Antigen processing and presentation	2	30	0.0739781	0.110967	ENSSSCP00000024395.2(K01363);ENSSSCP00000002653.4(K01369)	http://www.genome.jp/kegg-bin/show_pathway?ko04612/K01363%09cyan/K01369%09cyan
ko04380	Osteoclast differentiation	2	31	0.0783495	0.111339	ENSSSCP00000064716.1(K05090);ENSSSCP00000048828.2(K14380)	http://www.genome.jp/kegg-bin/show_pathway?ko04380/K05090%09cyan/K14380%09cyan
ko05150	Staphylococcus aureus infection	2	32	0.0828016	0.111782	ENSSSCP00000018489.3(K07604);ENSSSCP00000014399.3(K03990)	http://www.genome.jp/kegg-bin/show_pathway?ko05150/K07604%09cyan/K03990%09cyan
ko05322	Systemic lupus erythematosus	2	35	0.0966092	0.124212	ENSSSCP00000025103.2(K05699);ENSSSCP00000014399.3(K03990)	http://www.genome.jp/kegg-bin/show_pathway?ko05322/K05699%09cyan/K03990%09cyan
ko04145	Phagosome	3	81	0.120959	0.148449	ENSSSCP00000035292.2(K13882);ENSSSCP00000029501.3(K06503);ENSSSCP00000014399.3(K03990)	http://www.genome.jp/kegg-bin/show_pathway?ko04145/K13882%09cyan/K06503%09cyan/K03990%09cyan
ko04714	Thermogenesis	3	121	0.274712	0.314484	ENSSSCP00000013693.4(K08765);ENSSSCP00000056573.1(K01897);ENSSSCP00000073219.1(K00237)	http://www.genome.jp/kegg-bin/show_pathway?ko04714/K08765%09cyan/K01897%09cyan/K00237%09cyan
ko05203	Viral carcinogenesis	2	70	0.28551	0.314484	ENSSSCP00000025103.2(K05699);ENSSSCP00000014399.3(K03990)	http://www.genome.jp/kegg-bin/show_pathway?ko05203/K05699%09cyan/K03990%09cyan
ko05152	Tuberculosis	2	71	0.291189	0.314484	ENSSSCP00000035292.2(K13882);ENSSSCP00000014399.3(K03990)	http://www.genome.jp/kegg-bin/show_pathway?ko05152/K13882%09cyan/K03990%09cyan
ko05200	Pathways in cancer	2	143	0.646919	0.671801	ENSSSCP00000006990.4(K09290);ENSSSCP00000064716.1(K05090)	http://www.genome.jp/kegg-bin/show_pathway?ko05200/K09290%09cyan/K05090%09cyan
ko05010	Alzheimer disease	2	194	0.805623	0.805623	ENSSSCP00000003343.3(K04524);ENSSSCP00000073219.1(K00237)	http://www.genome.jp/kegg-bin/show_pathway?ko05010/K04524%09cyan/K00237%09cyan
